# Supplementary material
Source: PubMed Central journal article supplement (PMC2939488)
Supplement: supp_mol.110.065128_Supplemental_MOL_65128.pdf [file supp_mol.110.065128_Supplemental_MOL_65128.pdf]

## Supplemental Figures:

Blazer LL, Roman DL, Chung A, Larsen MJ, Greedy M, Husbands SM, Neubig RR.

Reversible, allosteric, small-molecule inhibitors of RGS proteins. Molecular

Pharmacology

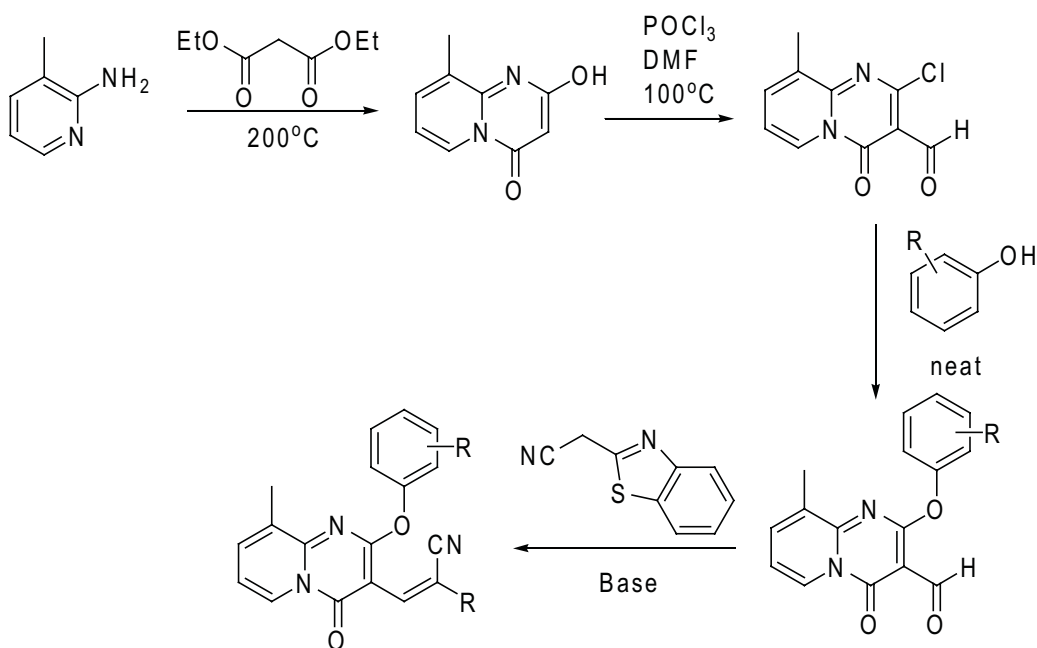

**Supplemental Figure 1.** Reaction scheme for the synthesis of CCG-63802 and CCG-63808.

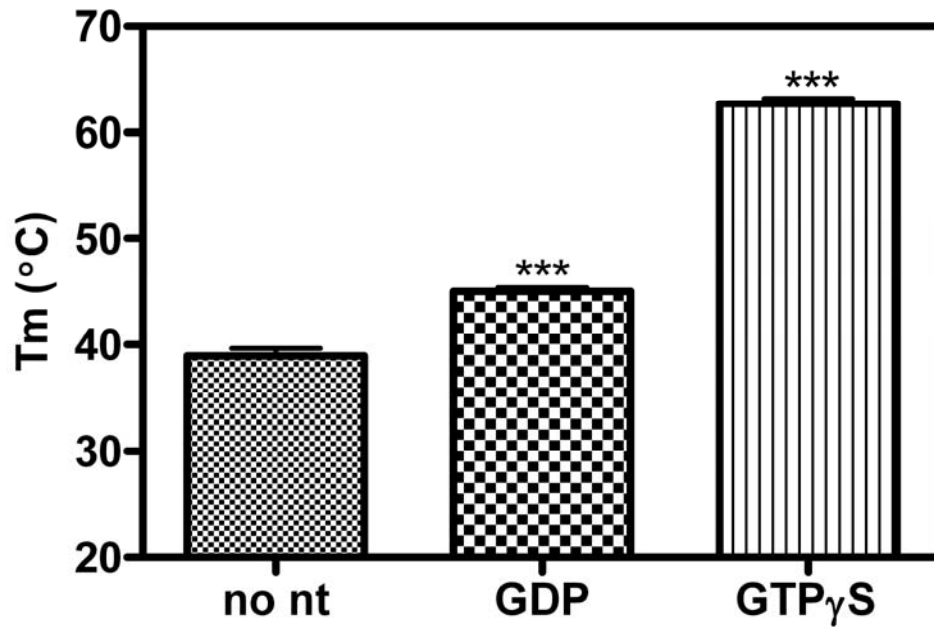

**Supplemental Figure 2.**  $G\alpha_o$  is thermally stabilized in presence of nucleotide. Purified  $G\alpha_o$  was stripped of nucleotide by gel filtration in a buffer containing EDTA. Lack of nucleotide was confirmed by spectroscopic analysis. The melting temperature ( $T_m$ ) of  $G\alpha_o$  (2.5  $\mu$ M) was determined by the thermal stability assay as described (see Methods) in the presence or absence of 50  $\mu$ M GDP or GTP $\gamma$ S. Nucleotide free (no nt)  $G\alpha_o$  has a  $T_m$  of  $38.9 \pm 0.7^\circ\text{C}$ . The protein is stabilized in the presence of 50  $\mu$ M GDP by 6°C ( $T_m$ :  $45.0 \pm 0.3^\circ\text{C}$ ) and is stabilized by 23°C in the presence of 50  $\mu$ M GTP $\gamma$ S ( $T_m$   $62.7 \pm 0.5^\circ\text{C}$ ). Data are presented as mean  $\pm$  SEM from 3 separate experiments.

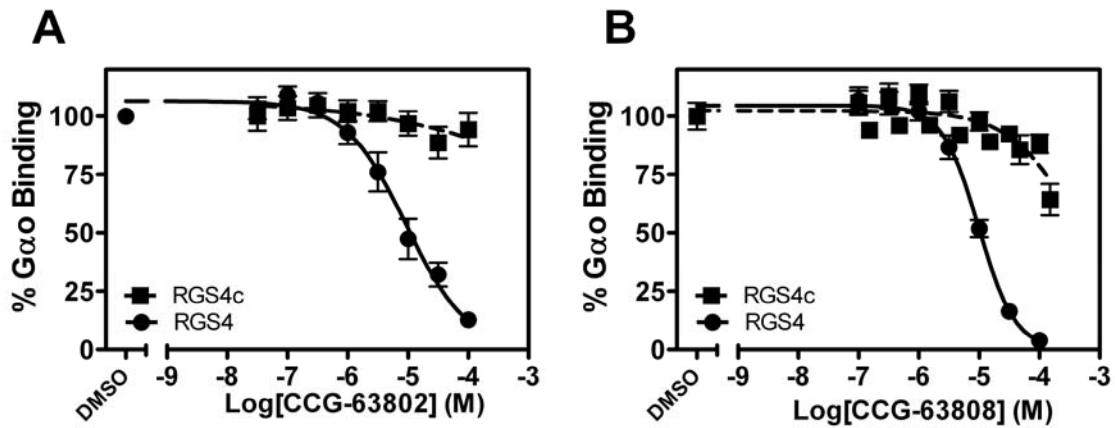

**Supplemental Figure 3.** A) CCG-63802 and B) CCG-63808 are much less potent on a mutant form of RGS4 that lacks cysteine residues in the RH domain. Data are presented as mean  $\pm$  SEM from 3 separate FCPIA experiments.
